# Supplementary material
Source: Springer Nature journal article supplement (https://www.springermedizin.de/resource/supplementary/12943_2007_345_MOESM5_ESM.pdf/9553974)

**A**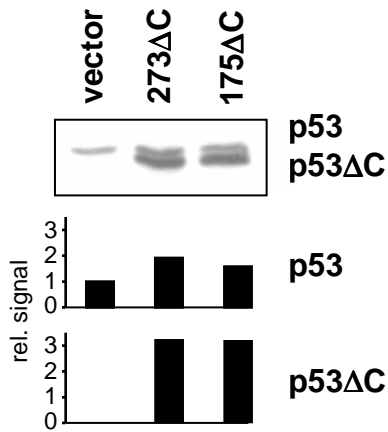**B**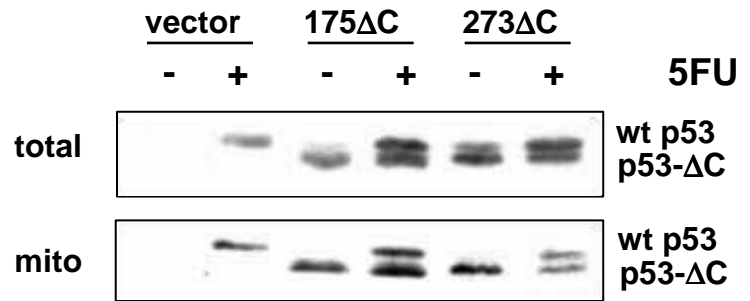**C**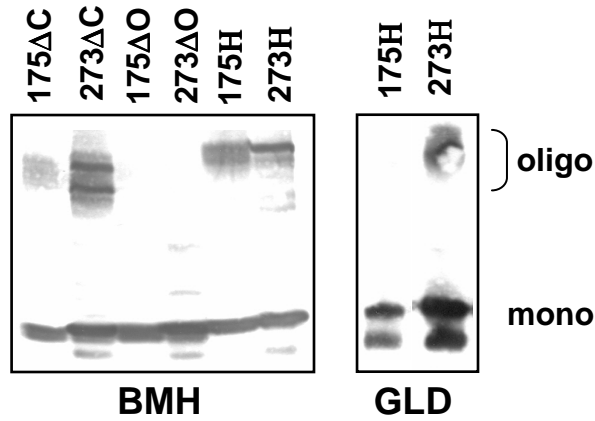**D**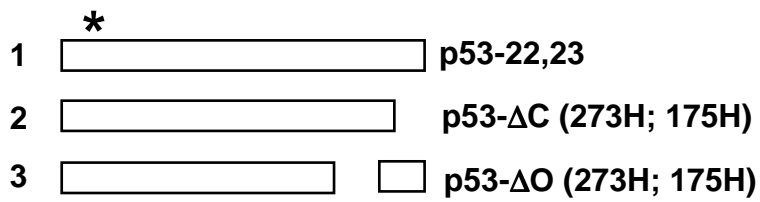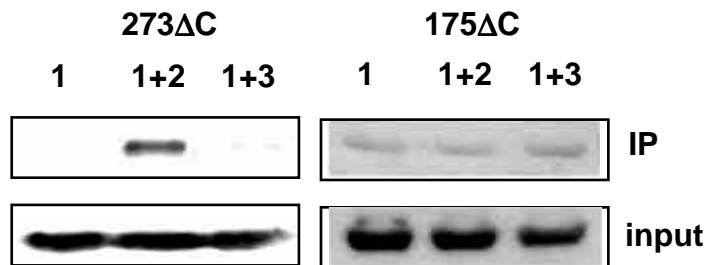

IP: anti-p53 (DO-1)

WB: anti-p53 (CM1)

Supplement: MOESM5 [file 9553974]
